# Supplementary material for: Do males and females respond differently to ocean acidification? An experimental study with the sea urchin Paracentrotus lividus
Source: PubMed Central journal article supplement (PMC7524842; doi:10.1007/s11356-020-10040-7), 2020-07-10
Supplement: 11356_2020_10040_MOESM1_ESM.pdf [file 11356_2020_10040_MOESM1_ESM.pdf]

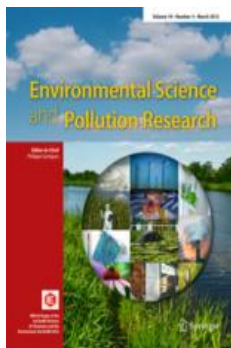

## Environmental Science and Pollution Research

SPI CODE

**HES (11356)**

PROJECT OFFICER

**Dennis E. Villahermosa**

FREE COLOR THROUGHOUT (Y/N)

**Y**

LAYOUT (STANDARD/NON-STANDARD)

**Standard**

## JOURNAL INSTRUCTIONS/UPDATES

| <b>AFFECTED PROCESS</b> | <b>INSTRUCTIONS</b>                                                                                                  |
|-------------------------|----------------------------------------------------------------------------------------------------------------------|
| PREK/TYPESETTING/QA     | Editorial articles: please capture the Author Biography and Photos                                                   |
| PREK/CED                | If the provided "Highlights" is one sentence only per highlight, capture it as article note. Otherwise, query to PO. |
| PREK/CED/TYPESETTING    | Insert Editorial Responsibility - Responsible Editor: Philipp Gariguess                                              |

**REVISION HISTORY**

| <b>Revision No.</b> | <b>Revision Date</b> | <b>Author</b>       | <b>Revision Description</b>                                          |
|---------------------|----------------------|---------------------|----------------------------------------------------------------------|
| 01                  |                      | Ganabee Catalan     | Initial Issue                                                        |
| 02                  | 04/26/10             | Ganabee Catalan     | Removal of entries which can be referred to TechInfo in the jobsheet |
| 03                  | 07/16/10             | Ganabee Catalan     | Removal of entries which can be referred to TechInfo in the jobsheet |
| 04                  | 06/16/12             | Ganabee Catalan     | New JRD format                                                       |
| 05                  | 05/16/13             | Dennis Villahermosa | Re-phrase Editorial Responsibility                                   |
| 06                  | 12/06/13             | Dennis Villahermosa | Inclusion of Editorial Responsibility in Spice                       |
| 07                  | 01/11/14             | Dennis Villahermosa | Reviewed                                                             |
| 8                   | 02/08/14             | Dennis Villahermosa | Instructions for Editorial articles                                  |
| 9                   | 02/23/15             | Dennis Villahermosa | Reviewed                                                             |
| 10                  | 01/15/18             | Dennis Villahermosa | Reviewed                                                             |
| 11                  | 01/04/19             | Dennis Villahermosa | Instruction for Political Neutrality Disclaimer SRG                  |
| 12                  | 06/03/19             | Dennis Villahermosa | Instruction for Highlights section                                   |
